# Supplementary material for: Myzus persicae Management through Combined Use of Beneficial Insects and Thiacloprid in Pepper Seedlings
Source: MDPI journal article supplement (doi:10.3390/insects12090791), 2021-09-03

Table S1 Concentration range used in the acute toxicity determination the aphids and the natural enemies.

| Pesticides      | Insects              | Concentration range<br>(mg a.i.·L <sup>-1</sup> ) | doses |
|-----------------|----------------------|---------------------------------------------------|-------|
| Imidacloprid    | <i>M. persicae</i>   | 0.007-700                                         | 6     |
|                 | <i>H. axyridis</i>   | 0.011-7.00                                        | 5     |
|                 | <i>A. aphidimyza</i> | 0.022-14.00                                       | 5     |
| Nitenpyram      | <i>M. persicae</i>   | 0.001-100.00                                      | 6     |
|                 | <i>H. axyridis</i>   | 6.25-100                                          | 5     |
|                 | <i>A. aphidimyza</i> | 0.0032-2.00                                       | 5     |
| Acetamiprid     | <i>M. persicae</i>   | 1.95-500.00                                       | 5     |
|                 | <i>H. axyridis</i>   | 0.0063-2.00                                       | 5     |
|                 | <i>A. aphidimyza</i> | 0.0064-4.00                                       | 5     |
| Thiacloprid     | <i>M. persicae</i>   | 0.0002-20.00                                      | 6     |
|                 | <i>H. axyridis</i>   | 0.125-4.00                                        | 6     |
|                 | <i>A. aphidimyza</i> | 0.02-200.00                                       | 5     |
| Thiamethoxam    | <i>M. persicae</i>   | 0.0025-250.00                                     | 6     |
|                 | <i>H. axyridis</i>   | 0.04-25.00                                        | 5     |
|                 | <i>A. aphidimyza</i> | 0.008-5.00                                        | 5     |
| Clothianidin    | <i>M. persicae</i>   | 0.002-200.00                                      | 6     |
|                 | <i>H. axyridis</i>   | 0.0032-2.00                                       | 5     |
|                 | <i>A. aphidimyza</i> | 0.0064-4.00                                       | 5     |
| Dinotefuran     | <i>M. persicae</i>   | 0.128-400.00                                      | 6     |
|                 | <i>H. axyridis</i>   | 0.0064-4.00                                       | 5     |
|                 | <i>A. aphidimyza</i> | 0.0064-4.00                                       | 5     |
| Flupyradifurone | <i>M. persicae</i>   | 0.002-200.00                                      | 6     |
|                 | <i>H. axyridis</i>   | 0.50-8.00                                         | 5     |
|                 | <i>A. aphidimyza</i> | 0.0026-8.00                                       | 6     |

Table S2 Concentration range used in the acute toxicity determination of *B. terrestris*.

| Pesticides  | Insects              | Concentration range<br>( $\mu\text{g a.i.}\cdot\text{bee}^{-1}$ ) | doses |
|-------------|----------------------|-------------------------------------------------------------------|-------|
| Nitenpyram  | <i>B. terrestris</i> | 75.00-1200.00                                                     | 5     |
| Thiacloprid | <i>B. terrestris</i> | 125.00-2000.00                                                    | 5     |

Figure S1 Temperature recorded every hour during the tests. Where L = low temperature and H= high temperature.

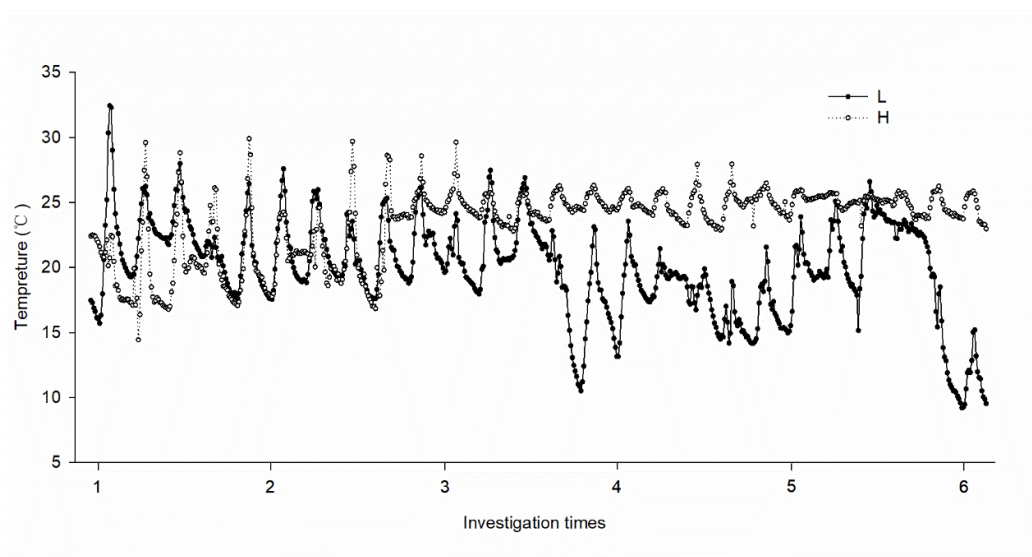

Supplement: s1 [file s1]
